# Supplementary material for: Identification of Combinatorial Patterns of Post-Translational Modifications on Individual Histones in the Mouse Brain
Source: PubMed Central journal article supplement (PMC3365036; doi:10.1371/journal.pone.0036980), 2012-05-31
Supplement: pone.0036980.s001.pdf [file pone.0036980.s001.pdf]

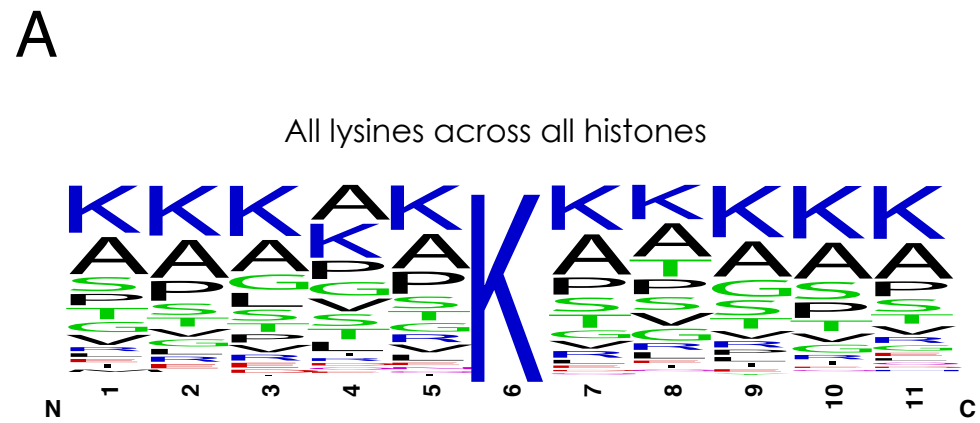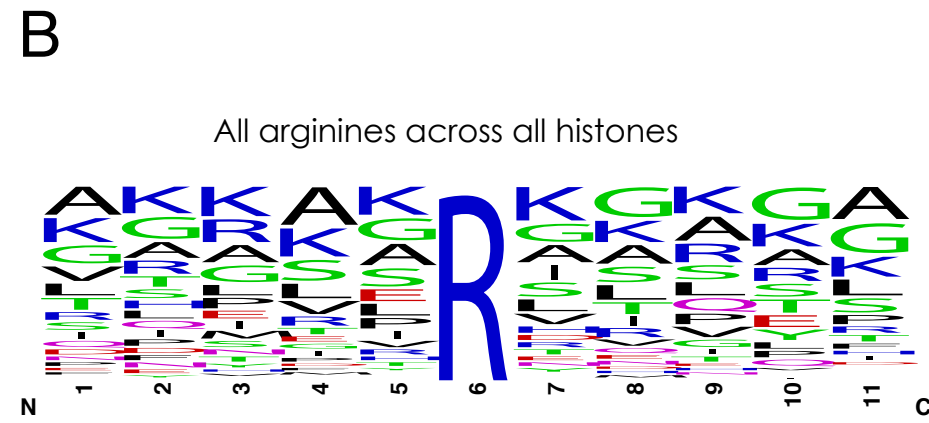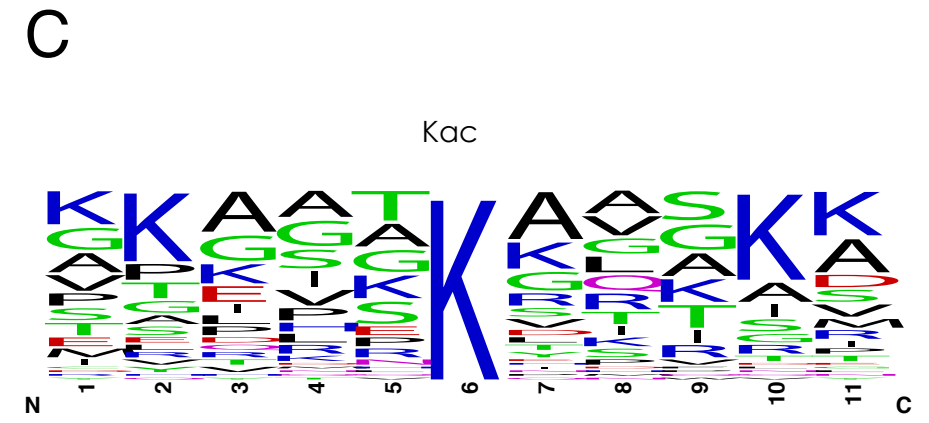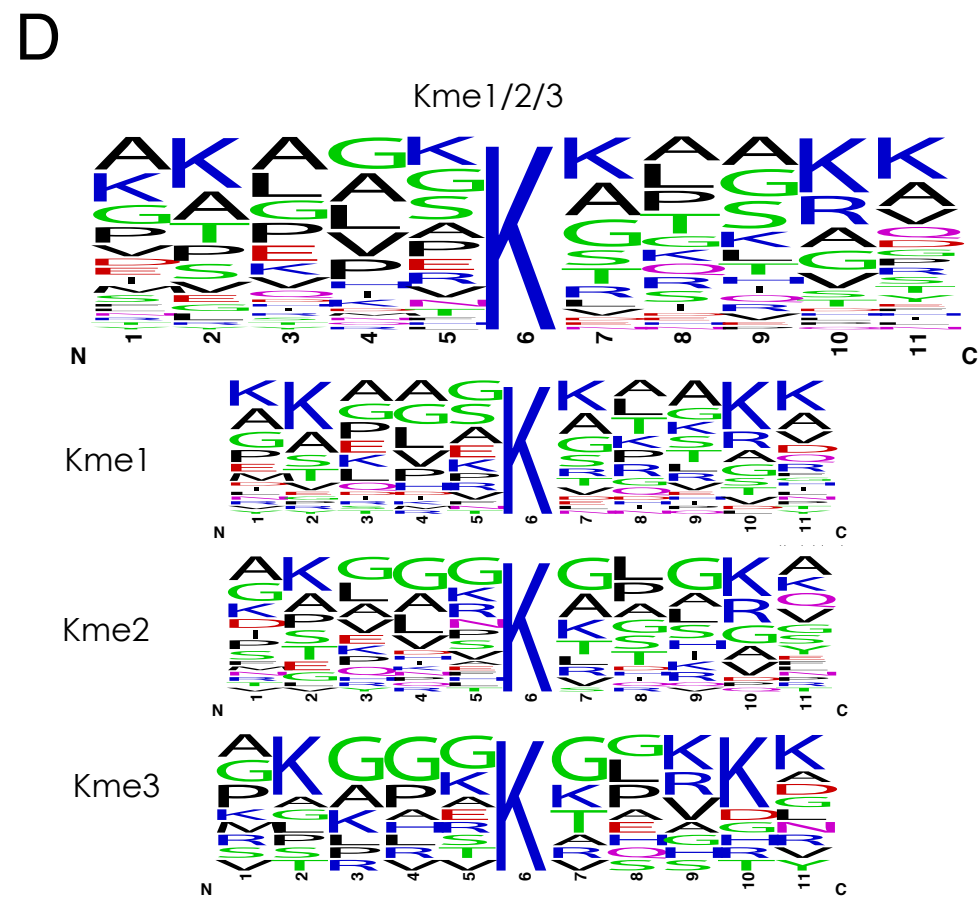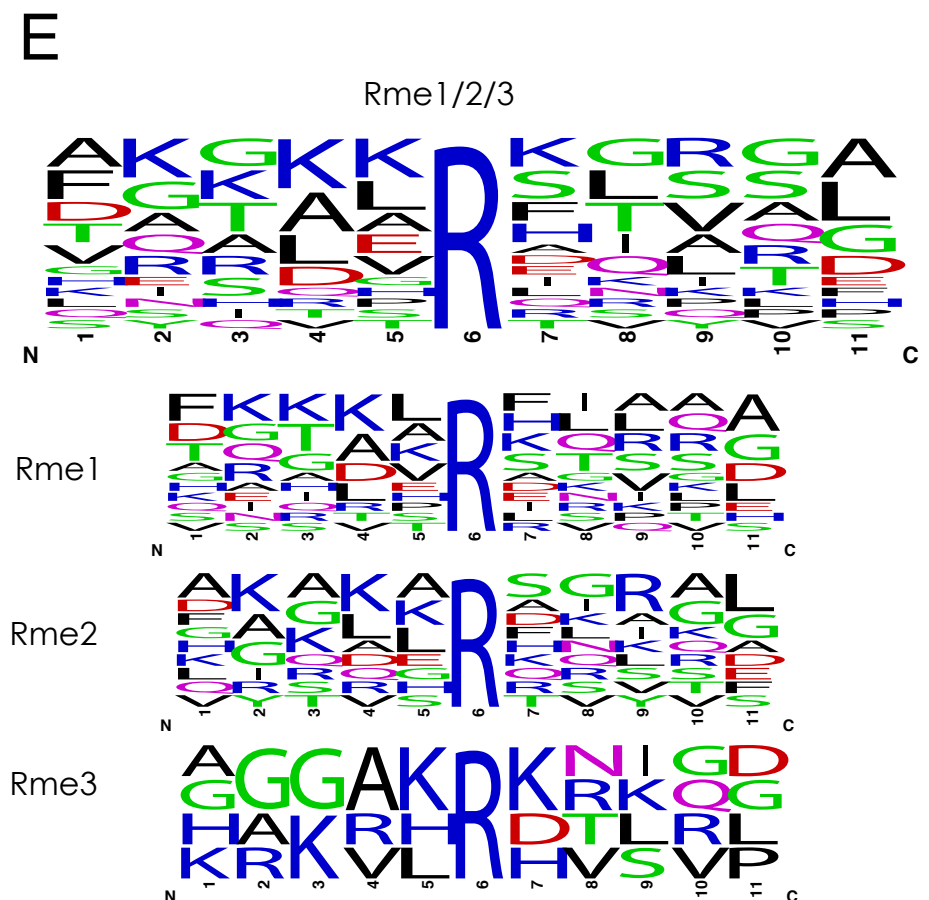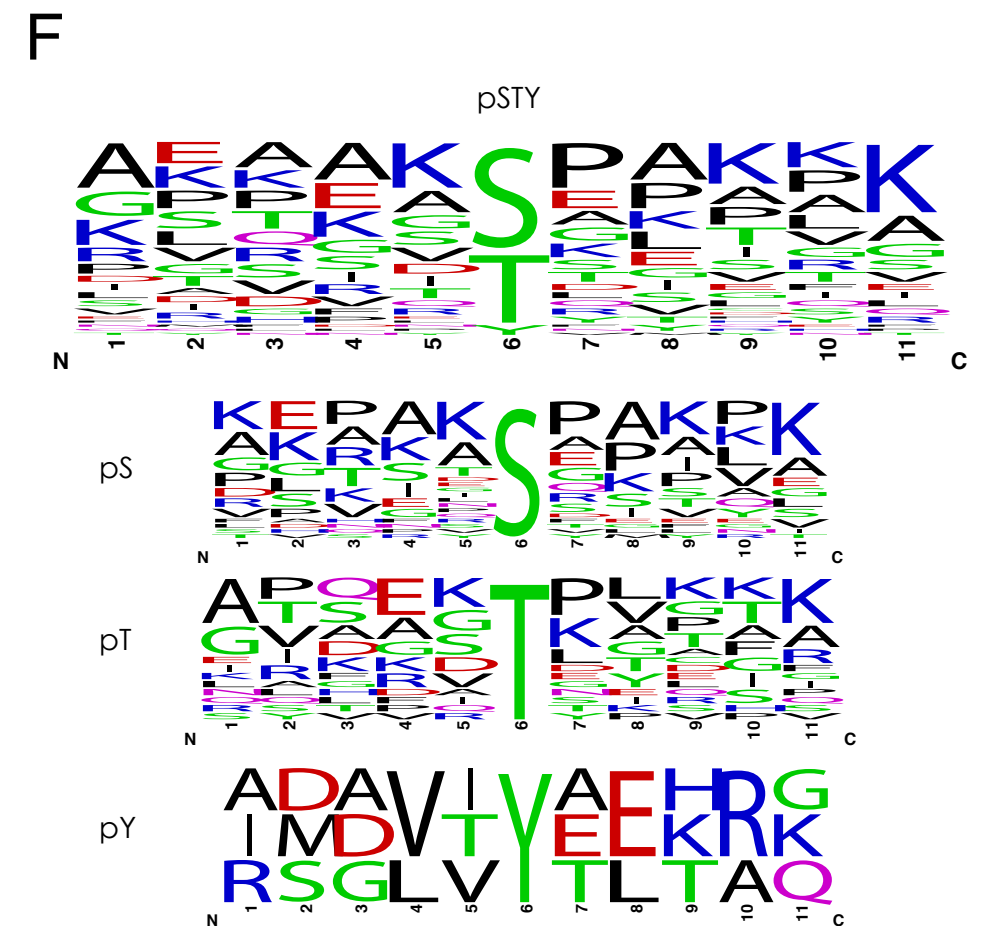

Figure S1
